# Supplementary material for: Ratio of Extracellular to Intracellular Water Is Associated with Permanent Catheter Patency Survival in Patients Receiving Maintenance Hemodialysis
Source: MDPI journal article supplement (doi:10.3390/diagnostics13152545), 2023-07-31
Supplement: s1 [file s1]

Supplementary Figure S1. ROC analysis of E/I ratio, LTI and FTI for patients of patent and non-patent group.

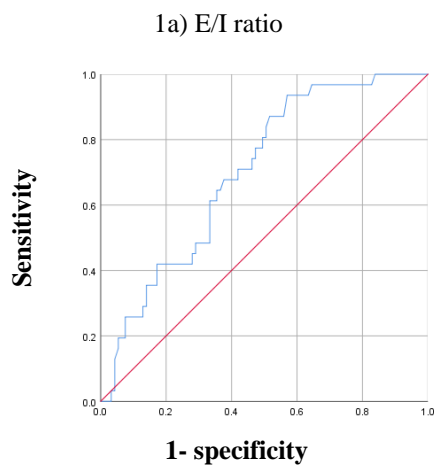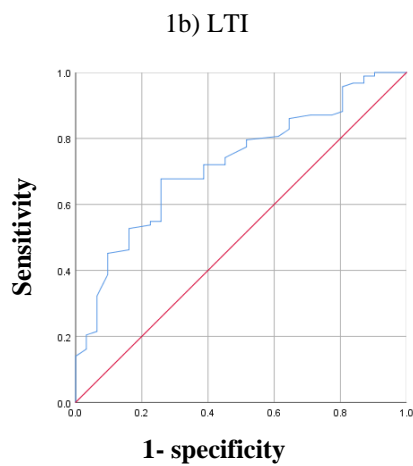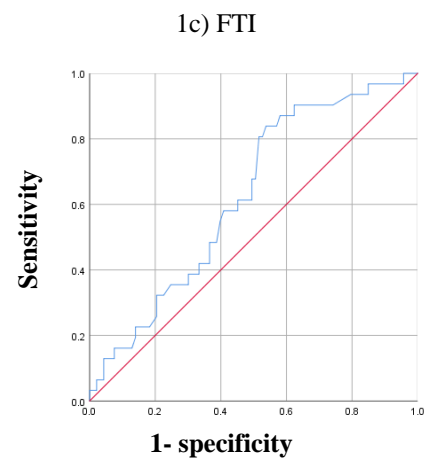

Supplementary Figure S2. Kaplan-Meier survival curve between groups with high CONUT score ( $\geq 3$ ) and low CONUS score ( $< 2$ )

2a) between patients of patent and non-patent group

n = 124

log-rank  $\chi^2 = 7.425$

p = 0.380

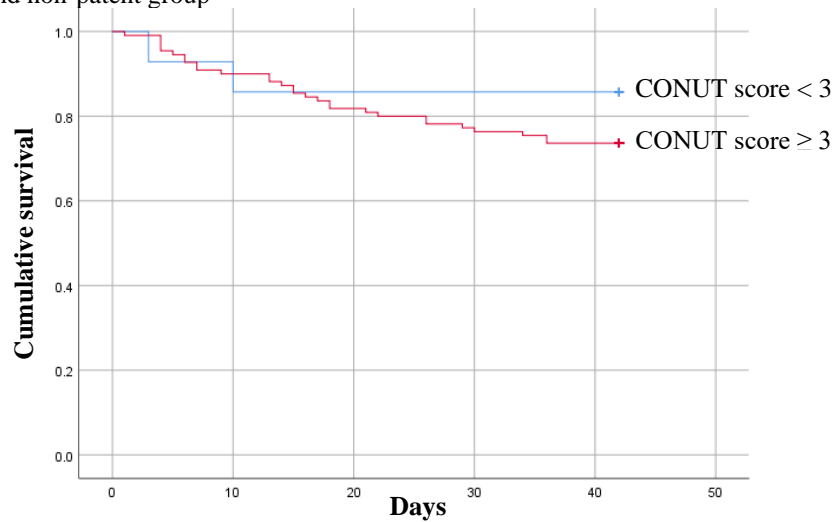

2b) between patients of patent and infection group

n = 124

log-rank  $\chi^2 = 7.425$

p = 0.486

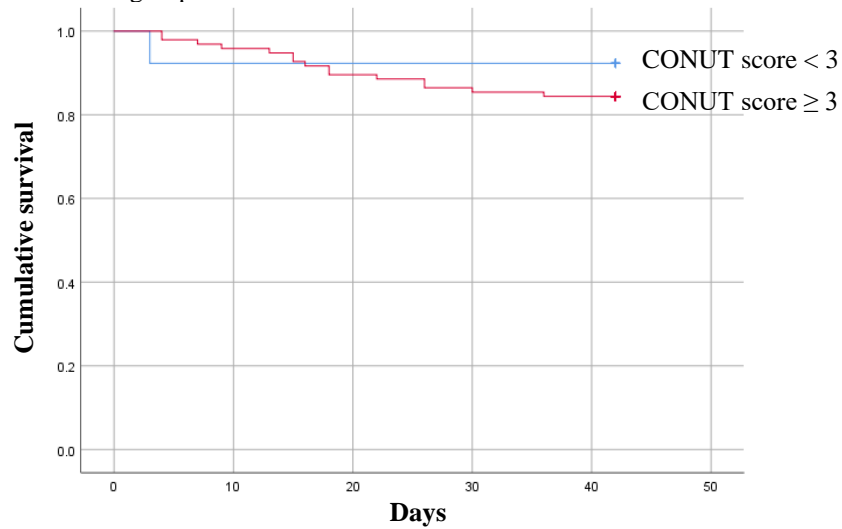

2c) between patients of patent and malfunction group

n = 124

log-rank  $\chi^2 = 7.425$

p = 0.135

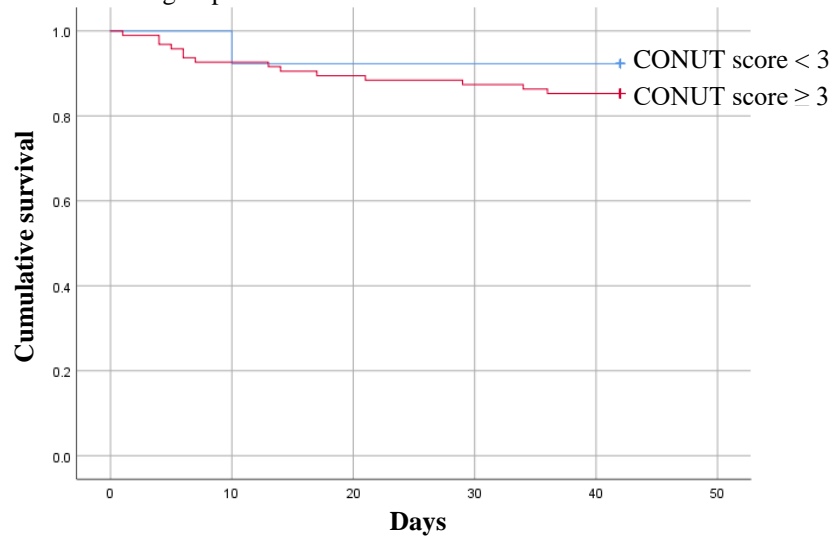

Supplementary Table S1a. Baseline characteristics of the study participants with infection subgroup

| Characteristics                              | Total<br>(N=124)   | Patent group<br>(N=93) | Infection subgroup<br>(N=16) | P<br>value |
|----------------------------------------------|--------------------|------------------------|------------------------------|------------|
| <b>Age (median [range] years)</b>            | 72.0 [26–93]       | 69.0 [26–93]           | 72.5 [50-86]                 | 0.293      |
| <b>Sex [n (%)]</b>                           |                    |                        |                              |            |
| Men                                          | 68 (54.8)          | 54 (58.1)              | 7 (43.8%)                    | 0.893      |
| Women                                        | 56 (45.2)          | 39 (41.9)              | 9 (56.3%)                    |            |
| <b>Comorbidities [n (%)]</b>                 |                    |                        |                              |            |
| Diabetes mellitus                            | 89 (71.8)          | 69 (74.2)              | 11 (68.8%)                   | 0.653      |
| Hypertension                                 | 96 (77.4)          | 68 (73.1)              | 13 (81.3%)                   | 0.496      |
| Heart failure                                | 41 (33.1)          | 31 (33.3)              | 6 (37.5%)                    | 0.748      |
| Ischemic heart disease                       | 34 (27.4)          | 28 (30.1)              | 3 (15%)                      | 0.357      |
| Atrial fibrillation                          | 24 (19.4)          | 15 (16.1)              | 5 (31.3%)                    | 0.152      |
| Cerebral infarction                          | 19 (15.3)          | 10 (10.8)              | 7 (43.8%)                    | 0.001      |
| Liver cirrhosis                              | 6 (4.8)            | 1 (1.1)                | 1 (6.3%)                     | 0.157      |
| <b>Medication [n (%)]</b>                    |                    |                        |                              |            |
| Aspirin                                      | 29 (23.4)          | 20 (21.5)              | 5 (31.3%)                    | 0.396      |
| Clopidogrel                                  | 33 (26.6)          | 24 (25.8)              | 7 (43.8%)                    | 0.144      |
| Warfarin                                     | 6 (4.8)            | 3 (3.2)                | 1 (6.3%)                     | 0.557      |
| Cilostazol                                   | 7 (5.6)            | 5 (5.4)                | 1 (6.3%)                     | 0.889      |
| NOAC                                         | 8 (6.5)            | 6 (6.5)                | 2 (12.5%)                    | 0.396      |
| Statin                                       | 61 (49.2)          | 46 (49.5)              | 8 (50%)                      | 0.969      |
| <b>Laboratory data (median [range])</b>      |                    |                        |                              |            |
| Hemoglobin (g/dL)                            | 9.6 [4.8–14.4]     | 9.5 [4.8–16.1]         | 9.7 [6.1-11.7]               | 0.722      |
| Total lymphocyte count (10 <sup>3</sup> /μl) | 1160.0 [240–11390] | 1270.0 [240–11390]     | 1000.0 [400-2160]            | 0.352      |
| Platelet (k)                                 | 189.0 [12–820]     | 191.0 [12–820]         | 126.0 [20-305]               | 0.023      |
| CRP (mg/dL)                                  | 1.8 [0.1–40]       | 1.1 [0.1–40]           | 4.0 [0.3-40.0]               | 0.072      |
| Total protein (g/dL)                         | 6.1 [4.1–8.4]      | 6.1 [3.2–8.4]          | 5.9 [4.2-7.9]                | 0.598      |
| Albumin (g/dL)                               | 3.0 [1.6–4.4]      | 3.0 [1.5–4.4]          | 2.8 [1.9-3.7]                | 0.077      |
| BUN (mg/dL)                                  | 54.3 [11.9–177.8]  | 53.0 [13.9–184]        | 56.6 [11.9-121.1]            | 0.837      |
| Creatinine (mg/dL)                           | 4.8 [0.7–31.4]     | 5.1 [0.7–32.9]         | 3.5 [0.9-9.2]                | 0.030      |
| Total cholesterol (mg/dL)                    | 127.0 [45–494]     | 126.0 [45–494]         | 119.5 [52-219]               | 0.274      |
| Total Calcium (mg/dL)                        | 7.7 [5.0–10.5]     | 7.7 [5.0–10.4]         | 7.7 [6.1-10.5]               | 0.563      |
| Phosphorus (mg/dL)                           | 4.2 [1.5–12.6]     | 4.1 [1.5–12.6]         | 4.0 [1.7-9.9]                | 0.473      |
| Sodium (mEq/L)                               | 136.5 [122–153.6]  | 136.6 [122–153]        | 136.5 [124-153.6]            | 0.986      |
| Potassium (mEq/L)                            | 4.3 [2.8–7.8]      | 4.3 [2.8–7.8]          | 3.9 [3.1-6.2]                | 0.367      |
| BMI (kg/m <sup>2</sup> )                     | 23.5 [15.1–41.9]   | 23.4 [15.1–41.9]       | 26.3 [16.0-37.8]             | 0.217      |
| <b>Body composition (median [range])</b>     |                    |                        |                              |            |
| ECW (L)                                      | 16.2 [8.4–32.5]    | 17.4 [8.4–32.5]        | 15.5 [11.5-27.4]             | 0.388      |
| ICW (L)                                      | 15.3 [7.8–28.0]    | 15.8 [7.9–28.0]        | 12.8 [8.2-18.1]              | 0.012      |
| TBW (L)                                      | 31.8 [16.3–56.4]   | 33.8 [16.3–56.4]       | 29.8 [19.7-45.4]             | 0.059      |
| ECW/ICW (E/I ratio)                          | 1.13 [0.62–1.90]   | 1.05 [0.62–1.89]       | 1.19 [0.87-1.78]             | 0.056      |
| LTI (kg/m <sup>2</sup> )                     | 11.6 [5.3–21.4]    | 12.4 [5.8–21.4]        | 9.1 [5.3-15.1]               | 0.003      |
| FTI (kg/m <sup>2</sup> )                     | 10.7 [0.9–29.8]    | 9.7 [0.9–29.0]         | 11.5 [5.1-29.8]              | 0.033      |
| LTM (kg)                                     | 28.2 [2.0–59.3]    | 30.7 [2.0–59.3]        | 23.4 [13.8-39.8]             | 0.070      |
| ATM (kg)                                     | 24.8 [2.3–66.9]    | 24.0 [2.3–64.5]        | 30.1 [2.8-66.9]              | 0.098      |
| FAT (kg)                                     | 18.4 [1.7–49.2]    | 17.6 [1.7–47.4]        | 22.1 [9.6-49.2]              | 0.024      |
| BCM                                          | 15.4 [2.3–36.1]    | 16.8 [2.3–36.1]        | 11.2 [4.1-22.7]              | 0.010      |
| Dry weight (kg)                              | 57.6 [33.5–99.7]   | 58.5 [33.5–99.7]       | 56.8 [37.2-90.9]             | 0.876      |

CRP: C-reactive protein, BUN : blood urea nitrogen, BMI : body mass index, ECW : extracellular water, ICW : intracellular water, TBW : total body water, LTI : lean tissue index, FTI : fat tissue index, LTM : lean tissue mass, ATM : adipose tissue mass, FAT : fat mass, BCM : body cell mass

Supplementary Table S1b. Baseline characteristics of the study participants with malfunction subgroup

| Characteristics                               | Overall<br>(N=124) | Patent group<br>(N=93) | Malfunction subgroup<br>(N=15) | P value |
|-----------------------------------------------|--------------------|------------------------|--------------------------------|---------|
| <b>Age (median [range] years)</b>             | 72.0 [26–93]       | 69.0 [26–93]           | 80.0 [59–92]                   | 0.000   |
| <b>Sex [n (%)]</b>                            |                    |                        |                                |         |
| Men                                           | 68 (54.8)          | 54 (58.1)              | 5 (33.3%)                      | 0.075   |
| Women                                         | 56 (45.2)          | 39 (41.9)              | 10 (66.7%)                     |         |
| <b>Comorbidities [n (%)]</b>                  |                    |                        |                                |         |
| Diabetes mellitus                             | 89 (71.8)          | 69 (74.2)              | 9 (60.0%)                      | 0.259   |
| Hypertension                                  | 96 (77.4)          | 68 (73.1)              | 15 (100%)                      | 0.022   |
| Heart failure                                 | 41 (33.1)          | 31 (33.3)              | 4 (26.7%)                      | 0.613   |
| Ischemic heart disease                        | 34 (27.4)          | 28 (30.1)              | 3 (20.0%)                      | 0.427   |
| Atrial fibrillation                           | 24 (19.4)          | 15 (16.1)              | 4 (26.7%)                      | 0.324   |
| Cerebral infarction                           | 19 (15.3)          | 10 (10.8)              | 2 (13.3%)                      | 0.770   |
| Liver cirrhosis                               | 6 (4.8)            | 1 (1.1)                | 4 (26.7%)                      | 0.000   |
| <b>Medication [n (%)]</b>                     |                    |                        |                                |         |
| Aspirin                                       | 29 (23.4)          | 20 (21.5)              | 4 (26.7%)                      | 0.659   |
| Clopidogrel                                   | 33 (26.6)          | 24 (25.8)              | 2 (13.3%)                      | 0.299   |
| Warfarin                                      | 6 (4.8)            | 3 (3.2)                | 2 (13.3%)                      | 0.085   |
| Cilostazol                                    | 7 (5.6)            | 5 (5.4)                | 1 (6.7%)                       | 0.841   |
| NOAC                                          | 8 (6.5)            | 6 (6.5)                | 0 (0%)                         | 0.316   |
| Statin                                        | 61 (49.2)          | 46 (49.5)              | 7 (46.7%)                      | 0.843   |
| <b>Laboratory data (median [range])</b>       |                    |                        |                                |         |
| Hemoglobin (g/dL)                             | 9.6 [4.8–14.4]     | 9.5 [4.8–16.1]         | 10.3 [6.5–13.0]                | 0.077   |
| Total lymphocyte count ( $10^3/\mu\text{L}$ ) | 1160.0 [240–11390] | 1270.0 [240–11390]     | 1000.0 [340–3220]              | 0.474   |
| Platelet (000s)                               | 189.0 [12–820]     | 191.0 [12–820]         | 244.0 [52–329]                 | 0.592   |
| CRP (mg/dL)                                   | 1.8 [0.1–40]       | 1.1 [0.1–40]           | 8.9 [0.1–29.1]                 | 0.003   |
| Total protein (g/dL)                          | 6.1 [4.1–8.4]      | 6.1 [3.2–8.4]          | 5.9 [4.1–7.4]                  | 0.416   |
| Albumin (g/dL)                                | 3.0 [1.6–4.4]      | 3.0 [1.5–4.4]          | 2.6 [1.6–3.8]                  | 0.029   |
| BUN (mg/dL)                                   | 54.3 [11.9–177.8]  | 53.0 [13.9–184]        | 54.9 [30.9–143.4]              | 0.915   |
| Creatinine (mg/dL)                            | 4.8 [0.7–31.4]     | 5.1 [0.7–32.9]         | 5.1 [1.2–11.7]                 | 0.246   |
| Total cholesterol (mg/dL)                     | 127.0 [45–494]     | 126.0 [45–494]         | 168.0 [59–290]                 | 0.429   |
| Total calcium (mg/dL)                         | 7.7 [5.0–10.5]     | 7.7 [5.0–10.4]         | 7.9 [5.3–9.3]                  | 0.356   |
| Phosphorus (mg/dL)                            | 4.2 [1.5–12.6]     | 4.1 [1.5–12.6]         | 4.8 [2.1–9.3]                  | 0.968   |
| Sodium (mEq/L)                                | 136.5 [122–153.6]  | 136.6 [122–153]        | 136.4 [131.0–150.4]            | 0.240   |
| Potassium (mEq/L)                             | 4.3 [2.8–7.8]      | 4.3 [2.8–7.8]          | 4.4 [2.8–6.0]                  | 0.329   |
| BMI ( $\text{kg}/\text{m}^2$ )                | 23.5 [15.1–41.9]   | 23.4 [15.1–41.9]       | 23.3 [18.1–39.2]               | 0.845   |
| <b>Body composition (median [range])</b>      |                    |                        |                                |         |
| ECW (L)                                       | 16.2 [8.4–32.5]    | 17.4 [8.4–32.5]        | 13.9 [10.3–30.7]               | 0.622   |
| ICW (L)                                       | 15.3 [7.8–28.0]    | 15.8 [7.9–28.0]        | 11.4 [7.8–22.2]                | 0.004   |
| TBW (L)                                       | 31.8 [16.3–56.4]   | 33.8 [16.3–56.4]       | 27.0 [20.3–52.9]               | 0.064   |
| ECW/ICW ratio                                 | 1.13 [0.62–1.90]   | 1.05 [0.62–1.89]       | 1.25 [1.00–1.60]               | 0.003   |
| LTI ( $\text{kg}/\text{m}^2$ )                | 11.6 [5.3–21.4]    | 12.4 [5.8–21.4]        | 10.2 [5.7–16.4]                | 0.010   |
| FTI ( $\text{kg}/\text{m}^2$ )                | 10.7 [0.9–29.8]    | 9.7 [0.9–29.0]         | 11.1 [2.1–20.6]                | 0.368   |
| LTM (kg)                                      | 28.2 [2.0–59.3]    | 30.7 [2.0–59.3]        | 22.9 [12.5–51.3]               | 0.071   |
| ATM (kg)                                      | 24.8 [2.3–66.9]    | 24.0 [2.3–64.5]        | 26.2 [2.4–56.2]                | 0.890   |
| FAT (kg)                                      | 18.4 [1.7–49.2]    | 17.6 [1.7–47.4]        | 20.8 [4.9–41.3]                | 0.455   |
| Body cell mass                                | 15.4 [2.3–36.1]    | 16.8 [2.3–36.1]        | 11.7 [4.3–29.6]                | 0.016   |
| Dry weight (kg)                               | 57.6 [33.5–99.7]   | 58.5 [33.5–99.7]       | 51.9 [44.8–74.0]               | 0.084   |

CRP: C-reactive protein, BUN : blood urea nitrogen, BMI : body mass index, ECW : extracellular water, ICW : intracellular water, TBW : total body water, LTI : lean tissue index, FTI : fat tissue index, LTM : lean tissue mass, ATM : adipose tissue mass, FAT : fat mass, BCM : body cell mass

Supplementary Table S2. Univariate Cox proportional hazards analysis in non-patent group

|                        | Hazard ratio | 95% CI of difference |        | P value |
|------------------------|--------------|----------------------|--------|---------|
|                        |              | Lower                | Upper  |         |
| Sex                    | 0.630        | 0.311                | 1.278  | 0.201   |
| Age                    | 1.050        | 1.017                | 1.084  | 0.003   |
| DM                     | 0.671        | 0.322                | 1.402  | 0.289   |
| HTN                    | 2.950        | 0.897                | 9.750  | 0.075   |
| BMI                    | 1.037        | 0.969                | 1.109  | 0.295   |
| ECW                    | 0.962        | 0.888                | 1.042  | 0.344   |
| ICW                    | 0.832        | 0.749                | 0.925  | 0.001   |
| TBW                    | 0.941        | 0.897                | 0.988  | 0.014   |
| E/I ratio              | 6.016        | 1.895                | 19.094 | 0.002   |
| LTI                    | 0.797        | 0.701                | 0.906  | 0.001   |
| FTI                    | 1.056        | 1.002                | 1.113  | 0.041   |
| LTM                    | 0.966        | 0.939                | 0.994  | 0.018   |
| ATM                    | 1.015        | 0.992                | 1.039  | 0.205   |
| FAT                    | 1.032        | 1.001                | 1.065  | 0.044   |
| BCM                    | 0.911        | 0.860                | 0.965  | 0.001   |
| Hemoglobin             | 1.159        | 0.947                | 1.419  | 0.152   |
| Total lymphocyte count | 1.000        | 0.999                | 1.000  | 0.214   |
| Platelet               | 0.998        | 0.995                | 1.001  | 0.252   |
| CRP                    | 1.047        | 1.017                | 1.078  | 0.002   |
| Total protein          | 0.854        | 0.567                | 1.287  | 0.451   |
| Albumin                | 0.431        | 0.220                | 0.842  | 0.014   |
| BUN                    | 1.000        | 0.989                | 1.011  | 0.969   |
| Creatinine             | 0.849        | 0.735                | 0.981  | 0.026   |
| Total cholesterol      | 0.999        | 0.994                | 1.004  | 0.776   |
| Total calcium          | 1.223        | 0.863                | 1.733  | 0.257   |
| Phosphorus             | 0.954        | 0.798                | 1.142  | 0.608   |
| Sodium                 | 1.031        | 0.956                | 1.112  | 0.434   |
| Potassium              | 1.010        | 0.681                | 1.498  | 0.959   |
